# Supplementary material
Source: PubMed Central journal article supplement (PMC4383135)
Supplement: NIHMS674086-supplement-Figure_1.pdf [file NIHMS674086-supplement-Figure_1.pdf]

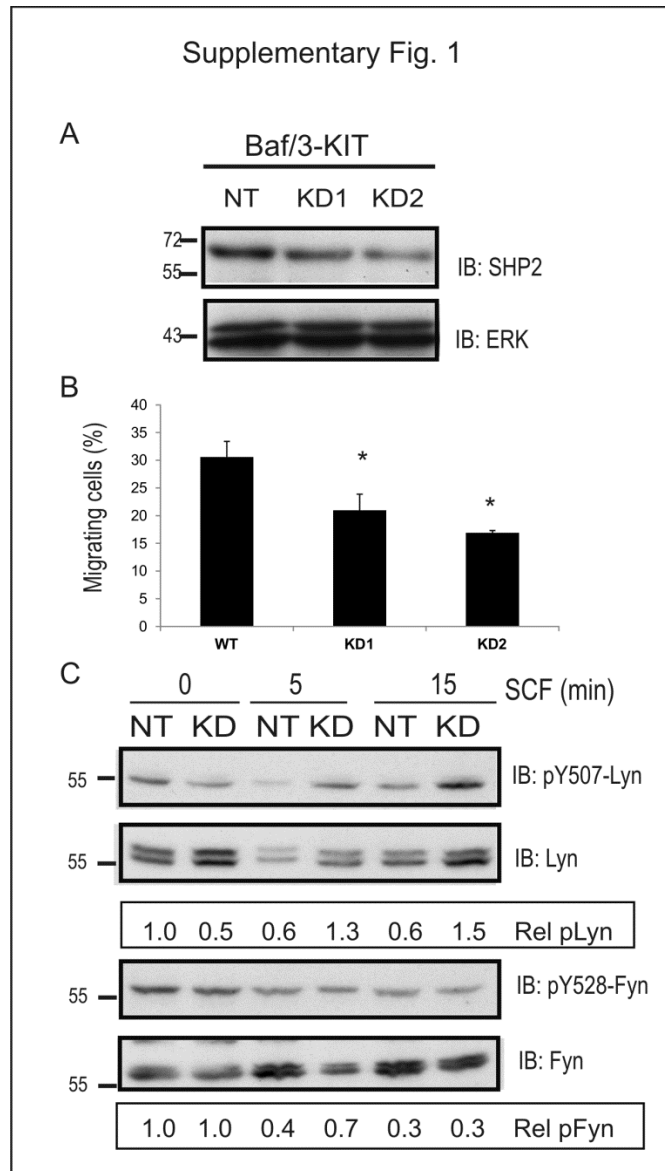

**FIGURE S1.** SHP2 promotes migration and Lyn activation in Baf/3-KIT cells treated with SCF. (A) Analysis of SHP2 protein levels in Baf/3-KIT NT, SHP2 KD1 and KD2 cell lysates. (B) Transwell chemotaxis assays for Baf/3-KIT NT, SHP2 KD1 and KD2 cells carried out in presence of SCF (25 ng/ml). Graph depicts percentage of cells (mean  $\pm$  SD) that had migrated to the lower chamber (triplicate samples; \* indicates statistically significant difference between NT and KD cells based on paired student t-test ( $p < 0.05$ )). (C) Baf/3-KIT NT and SHP2 KD2 cells were starved of IL-3 overnight and stimulated with or without SCF (50 ng/ml) for indicated times. Immunoblot (IB) analyses were conducted using anti-phospho-Y507-Lyn (pY507-Lyn), anti-Lyn, anti-phospho-Y528-Fyn (pY527 Src antibody cross-reacts with pY528-Fyn), and anti-Fyn. Relative phosphorylation (pY/total) values were determined by densitometry and are representative of 3 separate assays.
